# Supplementary material for: Determining time-weighted average concentrations of nitrate and ammonium in freshwaters using DGT with ion exchange membrane-based binding layers
Source: Royal Society of Chemistry journal article supplement (doi:10.1039/c6em00260a), 2016-01-01
Supplement: c6em00260a2.pdf [file c6em00260a2.pdf]

**Determining time-weighted average concentrations of nitrate and  
ammonium in freshwaters using DGT with ion exchange membrane-based  
binding layers**

*Jianyin Huang<sup>a</sup>, William W. Bennett<sup>a</sup>, David T. Welsh<sup>a\*</sup>, and Peter R. Teasdale<sup>a</sup>*

<sup>a</sup> Environmental Futures Research Institute, Griffith University, Gold Coast campus, QLD  
4215, Australia

\* Corresponding Author: [d.welsh@griffith.edu.au](mailto:d.welsh@griffith.edu.au). Tel: +61 (07) 555 28358. Fax: +61 (07)  
555 28067

## Contents

**Figure S1.** Mass of  $\text{NH}_4\text{-N}$  accumulated by CMI-DGT over 24 h at various ionic strength solutions.

**Figure S2.** Relationship between the diffusion coefficient of  $\text{NH}_4\text{-N}$  and conductivity for CMI-DGT.

**Figure S3.** Effects of different concentrations of  $\text{Na}^+$  (●),  $\text{K}^+$  (⊖),  $\text{Ca}^{2+}$  (□) and  $\text{Mg}^{2+}$  (□) on  $\text{NH}_4\text{-N}$  uptake.

**Figure S4.** Capacity of AMI-DGT for  $\text{NO}_3\text{-N}$  and CMI-DGT for  $\text{NH}_4\text{-N}$ .

**Table S1.** The recipe of synthetic freshwater ( $\text{pH} = 7.20 \pm 0.05$ ).

**Table S2.** Comparison of the uptake and elution efficiencies for binding membranes and hydrogels.

**Table S3.** Comparison of uptake of binding membranes and hydrogels for different pH.

**Table S4.** The corresponding  $D$  values of CMI-DGT and PrCH for  $\text{NH}_4^+$  at different conductivity (0.0001, 0.001 and 0.01 mol  $\text{L}^{-1}$  NaCl).

**Table S5.** Trigger values based on Queensland Water Quality Guidelines.

**Table S6.**  $\text{NO}_3\text{-N}$  concentrations at Loders Creek:  $C_{\text{SOLN}}$ ,  $C_{\text{A520E-DGT}}$  and  $C_{\text{AMI-DGT}}$ .

**Table S7.**  $\text{NH}_4\text{-N}$  concentrations at Loders Creek:  $C_{\text{SOLN}}$ ,  $C_{\text{PrCH-DGT}}$  and  $C_{\text{CMI-DGT}}$ .

**Table S8.**  $\text{NO}_3\text{-N}$  concentrations at Saltwater Creek:  $C_{\text{SOLN}}$ ,  $C_{\text{A520E-DGT}}$  and  $C_{\text{AMI-DGT}}$ .

**Table S9.**  $\text{NH}_4\text{-N}$  concentrations at Saltwater Creek:  $C_{\text{SOLN}}$ ,  $C_{\text{PrCH-DGT}}$  and  $C_{\text{CMI-DGT}}$ .

**Table S1.** The recipe of synthetic freshwater in 8 L (pH =  $7.20 \pm 0.05$  and conductivity =  $0.23 \text{ mS cm}^{-1}$ ).

Synthetic freshwater with different ionic strengths were prepared by proportionally changing the concentrations of ions (e.g.  $0.080 \text{ mS cm}^{-1} = \frac{2}{5}$  the amount of the ions in the new recipe,  $0.40 \text{ mS cm}^{-1} =$  approximately  $2 \times$  the amount). Finally, the concentration of  $\text{HCO}_3^-$  was  $<2 \text{ mmol L}^{-1}$  to maintain the pH ( $7.0 \pm 0.5$ ).

| Chemicals                                 | Concentration ( $\text{mmol L}^{-1}$ ) |
|-------------------------------------------|----------------------------------------|
| $\text{CaCl}_2 \cdot 2\text{H}_2\text{O}$ | 0.375                                  |
| $\text{Na}_2\text{SO}_4$                  | 0.115                                  |
| KCl                                       | 0.058                                  |
| NaCl                                      | 0.229                                  |
| $\text{MgCl}_2 \cdot 6\text{H}_2\text{O}$ | 0.294                                  |
| $\text{HCO}_3^-$                          | 0.983                                  |

AMI and CMI membranes had high uptake and elution efficiencies for NO<sub>3</sub>-N and NH<sub>4</sub>-N, respectively.

**Table S2.** Comparison of the uptake and elution efficiencies for binding membranes and hydrogels.

| Binding agents         | AMI        | A520E <sup>1</sup> | CMI        | PrCH <sup>2</sup> |
|------------------------|------------|--------------------|------------|-------------------|
| Uptake efficiency (%)  | 96.7 ± 3.3 | 98.7 ± 1.4         | 94.8 ± 2.3 | 92.5 ± 5.1        |
| Elution efficiency (%) | 77.6 ± 6.1 | 82.7 ± 4.2         | 89.9 ± 4.6 | 87.2 ± 5.3        |

The ratios of  $C_{\text{AMI-DGT}}/C_{\text{SOLN}}$  and  $C_{\text{CMI-DGT}}/C_{\text{SOLN}}$  were between 0.87 and 1.06, suggesting that the binding layer membranes produced similar results to the resin binding gels.

**Table S3.** Comparison of the uptake of binding membranes and hydrogels for different pH.

| pH  | $C_{\text{AMI-DGT}}/C_{\text{SOLN}}$ | $C_{\text{A520E-DGT}}/C_{\text{SOLN}}$ | $C_{\text{CMI-DGT}}/C_{\text{SOLN}}$ | $C_{\text{PrCH-DGT}}/C_{\text{SOLN}}$ |
|-----|--------------------------------------|----------------------------------------|--------------------------------------|---------------------------------------|
| 3.5 | 0.87 ± 0.02                          | 0.94 ± 0.04                            | 0.89 ± 0.07                          | 1.02 ± 0.06                           |
| 5   | 0.91 ± 0.06                          | 0.92 ± 0.11                            | 0.95 ± 0.07                          | 0.95 ± 0.08                           |
| 7   | 1.01 ± 0.03                          | 1.00 ± 0.02                            | 0.91 ± 0.03                          | 0.99 ± 0.05                           |
| 8.5 | 0.93 ± 0.06                          | 0.89 ± 0.03                            | 0.90 ± 0.03                          | 1.06 ± 0.03                           |

Similar NH<sub>4</sub><sup>+</sup> diffusion coefficients were found in CMI-DGT and PrCH-DGT.<sup>2</sup> Mass of accumulated NH<sub>4</sub>-N on CMI-DGT decreased with increasing conductivity (Figure S3). High diffusion coefficient of NH<sub>4</sub><sup>+</sup> was found at low ionic strength (conductivity) and decreased with increasing conductivity (Figure S2).

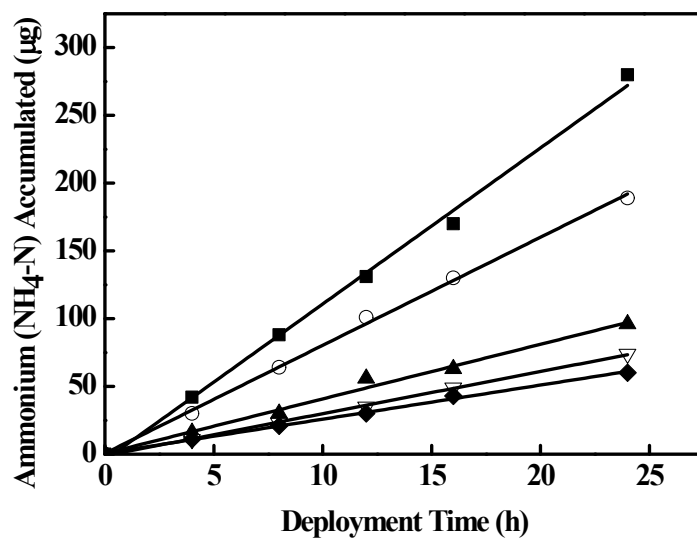

**Figure S1.** Mass of  $\text{NH}_4\text{-N}$  accumulated by CMI-DGT over 24 h at various ionic strength solutions. The solid line is a regression line. Experimental conditions:  $\text{NH}_4\text{-N} = 1.5 \pm 0.21 \text{ mg L}^{-1}$ ; conductivity =  $0.0855 \pm 0.001 \text{ mS cm}^{-1}$  (○),  $0.203 \pm 0.029 \text{ mS cm}^{-1}$  (∞);  $0.469 \pm 0.019 \text{ mS cm}^{-1}$  (◻);  $0.683 \pm 0.016 \text{ mS cm}^{-1}$  (♦);  $1.0 \pm 0.023 \text{ mS cm}^{-1}$  (⊕).

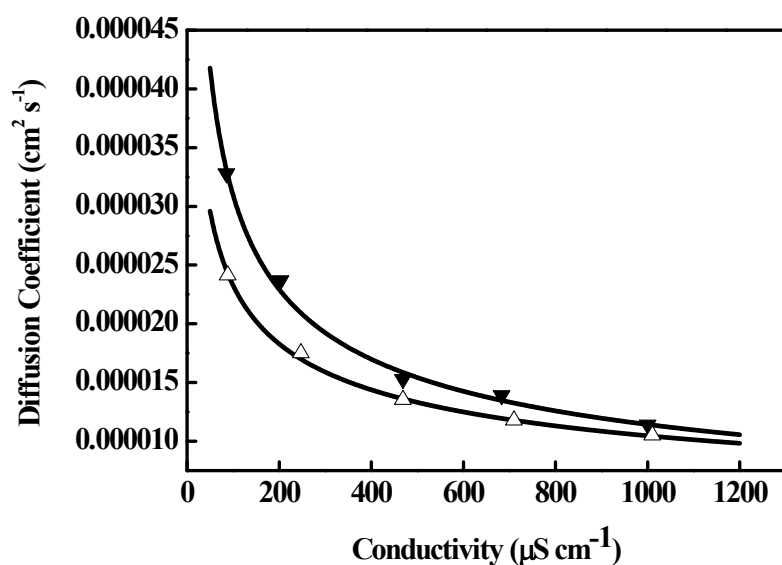

**Figure S2.** Relationship between the diffusion coefficient of  $\text{NH}_4\text{-N}$  and conductivity for CMI-DGT ( $\square$ ) and PrCH-DGT ( $\triangle$ ) using an agarose diffusive layer. Data were modified according to the Stokes-Einstein equation to 25 °C.  $\text{pH} = 7.07 \pm 0.44$ . The trend line for the exponential relationship between diffusion coefficient ( $D$ ) and conductivity for CMI-DGT was  $R^2 = 0.9979$ ,  $D = 0.000115 \text{ Conductivity}^{-0.346833}$  and PrCH-DGT was  $R^2 = 0.9918$ ,  $D = 0.000227 \text{ Conductivity}^{-0.432705}$ .

**Table S4.** The corresponding  $D$  values of CMI-DGT and PrCH for  $\text{NH}_4^+$  at different conductivity (0.0001, 0.001 and 0.01 mol  $\text{L}^{-1}$  NaCl).

| Conductivity<br>( $\mu\text{S cm}^{-1}$ )  | 22   | 141  | 1108 |
|--------------------------------------------|------|------|------|
| <b>D values<br/>(<math>10^{-5}</math>)</b> |      |      |      |
| CMI                                        | 3.93 | 2.07 | 1.01 |
| PrCH                                       | 5.96 | 2.67 | 1.09 |

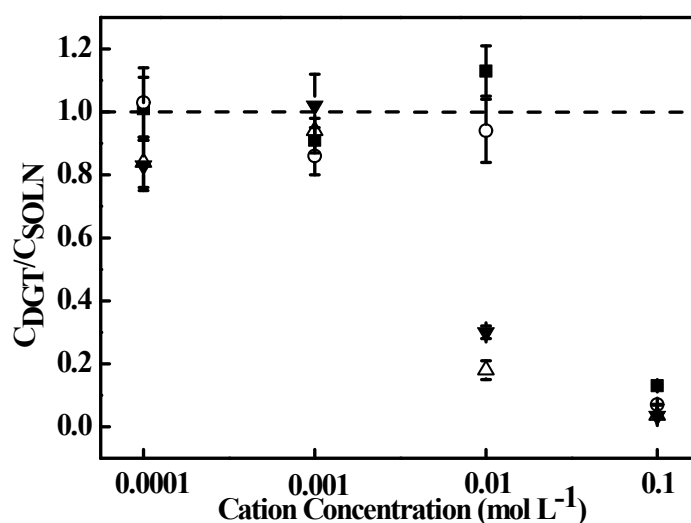

**Figure S3.** Effects of different concentrations of Na<sup>+</sup> (○), K<sup>+</sup> (△), Ca<sup>2+</sup> (□) and Mg<sup>2+</sup> (◇) on NH<sub>4</sub>-N uptake by CMI-DGT. Data are mean values (n = 3) ± 1 standard deviation. Experimental conditions: NH<sub>4</sub>-N concentration = 1.5 ± 0.1 mg L<sup>-1</sup>; time = 24 h; pH = 7.0 ± 0.37 for 0.0001 - 0.1 mol L<sup>-1</sup> Na<sup>+</sup>, K<sup>+</sup>, 0.0001 - 0.001 Ca<sup>2+</sup> and Mg<sup>2+</sup>, pH = 5.9 ± 0.28 for 0.01 - 0.1 mol L<sup>-1</sup> Ca<sup>2+</sup> and Mg<sup>2+</sup>.

$C_{DGT}:C_{SOLN}$  for NH<sub>4</sub>-N was between 0.84 and 1.03 at 0.0001 - 0.001 mol L<sup>-1</sup> of Na<sup>+</sup>, K<sup>+</sup>, Ca<sup>2+</sup> and Mg<sup>2+</sup>.  $C_{DGT}:C_{SOLN}$  was 1.13 and 0.94 at 0.01 mol L<sup>-1</sup> Na<sup>+</sup> and K<sup>+</sup>, respectively. As the ionic strength increased, the  $C_{DGT}:C_{SOLN}$  ratio for NH<sub>4</sub>-N tended to decrease in the presence of all cations. At 0.01 mol L<sup>-1</sup> Ca<sup>2+</sup> and Mg<sup>2+</sup>,  $C_{DGT}:C_{SOLN}$  ratio was only 0.18 and 0.30, respectively. CMI-DGT was not quantitative at 0.1 mol L<sup>-1</sup> for any of the cations.

Membrane DGTs have high binding capacities for  $\text{NO}_3\text{-N}$  ( $921 \pm 88 \mu\text{g}$ ) and  $\text{NH}_4\text{-N}$  ( $3512 \pm 51 \mu\text{g}$ ).

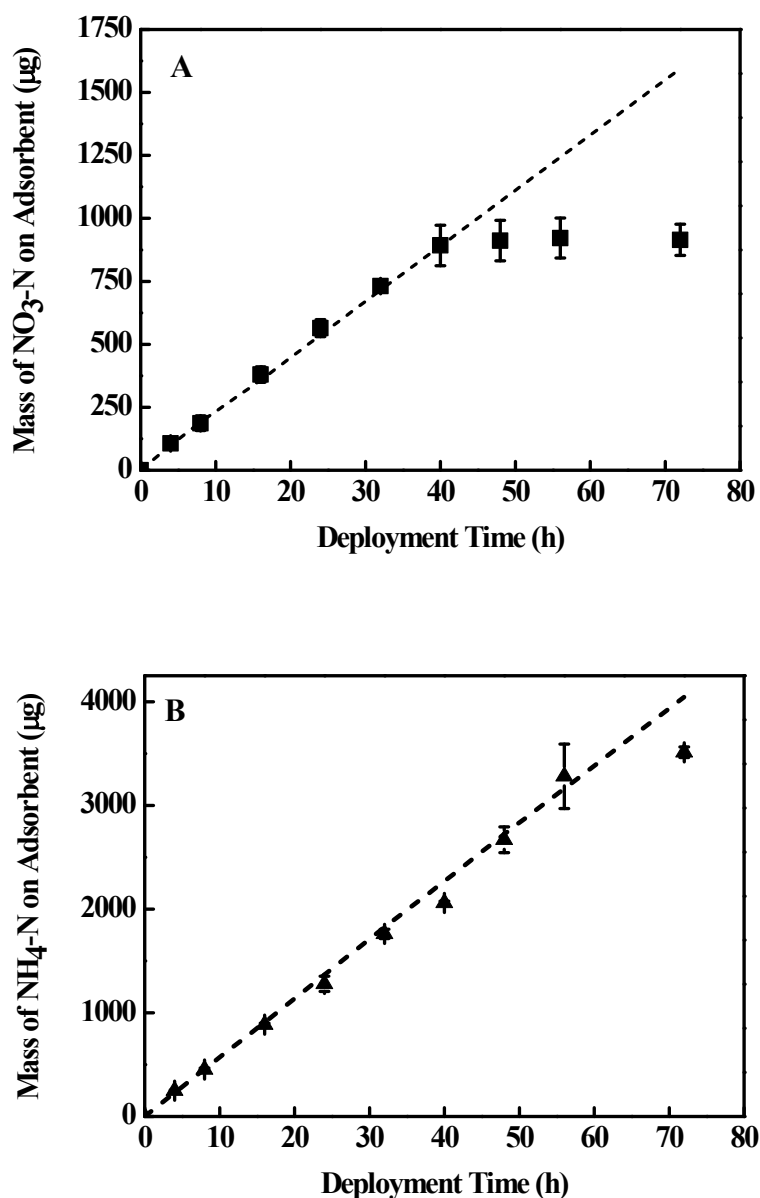

**Figure S4.** (A) Binding capacity of AMI-DGT ( $\bullet$ ) for  $\text{NO}_3\text{-N}$  and (B) CMI-DGT ( $\blacksquare$ ) for  $\text{NH}_4\text{-N}$ . Data are mean values ( $n = 3$ )  $\pm 1$  standard deviation. Experimental conditions: (A) initial  $\text{NO}_3\text{-N} = 13.6 \text{ mg L}^{-1}$ , final  $\text{NO}_3\text{-N} = 12.3 \mu\text{g L}^{-1}$ ; temperature =  $24.1 \pm 0.5 \text{ }^\circ\text{C}$ ; (B) initial  $\text{NH}_4\text{-N} = 33.1 \text{ mg L}^{-1}$ , final  $\text{NH}_4\text{-N} = 30.6 \text{ mg L}^{-1}$ ; temperature =  $23.5 \pm 0.4 \text{ }^\circ\text{C}$ ; both conductivities are between  $0.41 - 0.45 \text{ mS cm}^{-1}$  and volumes are  $8 \text{ L}$ .



**Table S5.** Trigger values based on Queensland Water Quality Guidelines.

| Ecosystem type                  | NO <sub>x</sub> -N (µg L <sup>-1</sup> ) | NH <sub>4</sub> -N (µg L <sup>-1</sup> ) | PO <sub>4</sub> -P (µg L <sup>-1</sup> ) |
|---------------------------------|------------------------------------------|------------------------------------------|------------------------------------------|
| Upland stream                   | 40                                       | 10                                       | 15                                       |
| Lowland stream                  | 60                                       | 20                                       | 20                                       |
| Freshwater lakes/<br>reservoirs | 10                                       | 10                                       | 5                                        |

**Table S6.** NO<sub>3</sub>-N concentrations (µg L<sup>-1</sup>) at Loders Creek:  $C_{\text{SOLN}}$ ,  $C_{\text{A520E-DGT}}$  and  $C_{\text{AMI-DGT}}$ .

Concentrations are presented as mean values ( $n = 3$ )  $\pm$  1 standard deviation.

| Time        | $C_{\text{SOLN}}$ | $C_{\text{AMI-DGT}}$ | $C_{\text{A520E-DGT}}$ | $C_{\text{AMI-DGT}}:C_{\text{A520E-DGT}}$ |
|-------------|-------------------|----------------------|------------------------|-------------------------------------------|
| 8 - 11 Dec  | 320.4 $\pm$ 205.0 | 404.1 $\pm$ 17.3     | 410.3 $\pm$ 6.0        | 0.98 $\pm$ 0.04                           |
| 11 - 14 Dec | 303.4 $\pm$ 74.9  | 268.5 $\pm$ 7.4      | 285.6 $\pm$ 1.6        | 0.94 $\pm$ 0.03                           |
| 14 - 17 Dec | 180.7 $\pm$ 43.3  | 178.5 $\pm$ 2.9      | 184.4 $\pm$ 2.1        | 0.97 $\pm$ 0.01                           |

**Table S7.** NH<sub>4</sub>-N concentrations (µg L<sup>-1</sup>) at Loders Creek:  $C_{\text{SOLN}}$ ,  $C_{\text{PrCH-DGT}}$  and  $C_{\text{CMI-DGT}}$ .

Concentrations are presented as mean values ( $n = 3$ )  $\pm$  1 standard deviation.

| Time        | $C_{\text{SOLN}}$ | $C_{\text{CMI-DGT}}$ | $C_{\text{PrCH-DGT}}$ | $C_{\text{CMI-DGT}}:C_{\text{PrCH-DGT}}$ |
|-------------|-------------------|----------------------|-----------------------|------------------------------------------|
| 8 - 11 Dec  | 167.5 $\pm$ 70.6  | 217.0 $\pm$ 12.4     | 238.0 $\pm$ 13.0      | 0.91 $\pm$ 0.08                          |
| 11 - 14 Dec | 217.2 $\pm$ 68.0  | 192.3 $\pm$ 0.7      | 229.6 $\pm$ 25.9      | 0.85 $\pm$ 0.09                          |
| 14 - 17 Dec | 269.1 $\pm$ 119.1 | 279.8 $\pm$ 20.7     | 309.9 $\pm$ 6.9       | 0.90 $\pm$ 0.07                          |

**Table S8.** NO<sub>3</sub>-N concentrations (µg L<sup>-1</sup>) at Saltwater Creek: C<sub>SOLN</sub>, C<sub>A520E-DGT</sub> and C<sub>AMI-DGT</sub>. Concentrations are presented as mean values (n = 3) ± 1 standard deviation.

| Time              | C <sub>SOLN</sub> | C <sub>AMI-DGT</sub> | C <sub>A520E-DGT</sub> | C <sub>AMI-DGT</sub> :C <sub>A520E-DGT</sub> |
|-------------------|-------------------|----------------------|------------------------|----------------------------------------------|
| 27 - 30 Jan       | 209.6 ± 58.5      | 256.8 ± 5.1          | 257.4 ± 8.0            | 1.06 ± 0.04                                  |
| 31 Jan - 2<br>Feb | 136.2 ± 19.9      | 159.2 ± 15.7         | 150.9 ± 9.5            | 1.06 ± 0.06                                  |
| 2 - 5 Feb         | 181.4 ± 32.7      | 184.3 ± 17.6         | 176.2 ± 16.2           | 1.10 ± 0.24                                  |

**Table S9.** NH<sub>4</sub>-N concentrations (µg L<sup>-1</sup>) at Saltwater Creek: C<sub>SOLN</sub>, C<sub>PrCH-DGT</sub> and C<sub>CMI-DGT</sub>. Concentrations are presented as mean values (n = 3) ± 1 standard deviation.

| Time              | C <sub>SOLN</sub> | C <sub>CMI-DGT</sub> | C <sub>PrCH-DGT</sub> | C <sub>CMI-DGT</sub> :C <sub>PrCH-DGT</sub> |
|-------------------|-------------------|----------------------|-----------------------|---------------------------------------------|
| 27 - 30 Jan       | 22.7 ± 5.4        | 20.8 ± 3.3           | 20.2 ± 1.3            | 1.11 ± 0.15                                 |
| 31 Jan - 2<br>Feb | 17.0 ± 4.7        | 15.2 ± 0.2           | 13.7 ± 1.3            | 1.11 ± 0.09                                 |
| 2 - 5 Feb         | 15.2 ± 5.6        | 16.5 ± 1.9           | 14.1 ± 1.6            | 1.21 ± 0.09                                 |

## References

1. J. Huang, W. W. Bennett, P. R. Teasdale, S. Gardiner and D. T. Welsh, *Anal. Chim. Acta.*, 2016, **923**, 74-81.
2. J. Huang, W. W. Bennett, D. T. Welsh, T. Li and P. R. Teasdale, *Anal. Chim. Acta.*, 2016, **904**, 83-91.
